# Supplementary material
Source: Springer Nature journal article supplement (https://www.springermedizin.de/resource/supplementary/12876_2012_847_MOESM2_ESM.pdf/9437604)

| Criterion         | Sensitivity | 95% CI       | Specificity | 95% CI       |
|-------------------|-------------|--------------|-------------|--------------|
| <b>&gt;=1.4</b>   | 100.00      | 71.5 - 100.0 | 0.00        | 0.0 - 4.1    |
| <b>&gt;62.7 *</b> | 100.00      | 71.5 - 100.0 | 98.88       | 93.9 - 100.0 |
| <b>&gt;65</b>     | 90.91       | 58.7 - 99.8  | 98.88       | 93.9 - 100.0 |
| <b>&gt;67.8</b>   | 90.91       | 58.7 - 99.8  | 100.00      | 95.9 - 100.0 |
| <b>&gt;287</b>    | 0.00        | 0.0 - 28.5   | 100.00      | 95.9 - 100.0 |

Area under the ROC curve 0.999  
Standard Error 0.00144  
95% Confidence Interval 0.962 to 1.000  
Significance level P (Area=0.5) <0.0001

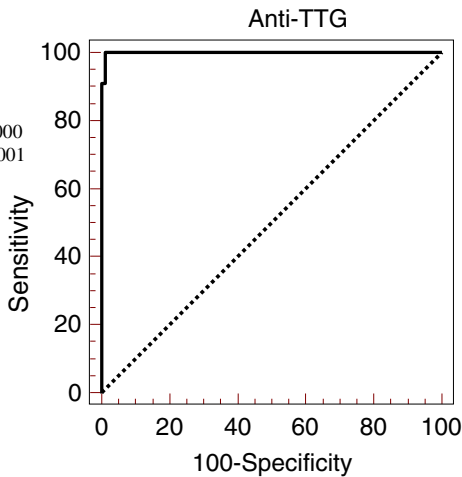

Supplement: MOESM2 [file 9437604]
